# Supplementary material
Source: publisher figshare collection journal article supplement (https://acs.figshare.com/ndownloader/files/3625221)
Supplement: Supplementary file 1 [file 3625221]

# Electronic Supplementary Information

## Microemulsification-based method: analysis of monoethylene glycol in samples related to natural gas processing

Jaqueline G. da Cunha,<sup>†,€</sup> Leandro Y. Shiroma,<sup>†,€</sup> Gabriela F. Giordano,<sup>†,€</sup> Bruno C. Couto,<sup>‡</sup> Rogério M. Carvalho,<sup>‡</sup> Angelo L. Gobbi,<sup>†</sup> Lauro T. Kubota,<sup>€,||</sup> and Renato S. Lima<sup>\*†,€</sup>

<sup>†</sup> Laboratório de Microfabricação, Laboratório Nacional de Nanotecnologia, Centro Nacional de Pesquisa em Energia e Materiais, Campinas, São Paulo 13083-970, Brasil.

<sup>€</sup> Instituto de Química, Universidade Estadual de Campinas, Campinas, São Paulo 13083-970, Brasil.

<sup>‡</sup> Centro de Pesquisas e Desenvolvimento Leopoldo Américo Miguez de Mello, Petrobras, Rio de Janeiro, Rio de Janeiro 21941-901, Brasil.

<sup>||</sup> Instituto Nacional de Ciência e Tecnologia em Bioanalítica, Campinas, São Paulo 13083-970, Brasil.

\*E-mail: [renato.lima@Innano.cnpem.br](mailto:renato.lima@Innano.cnpem.br).

### Principal component analyses

Principal component analysis (PCA) was applied to evaluate the presence of patterns as regards to the effect of W phase conductivities on data of MEC analytical sensitivity and robustness (absolute errors calculated for concentrations of analyte as highlighted in main text,  $\Delta\Phi$ ). The obtained graphic of scores is depicted in **Figure S1**. In this case, the independent variables

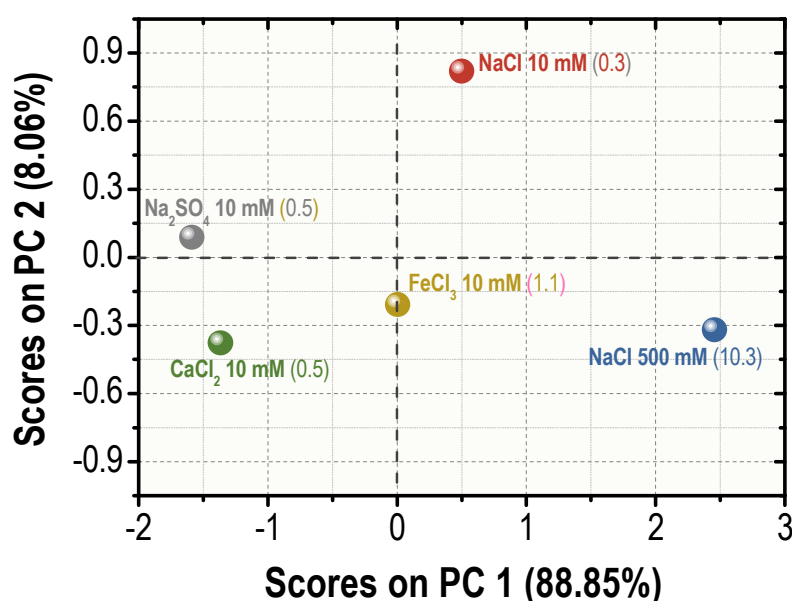

**Figure S1.** Scores of the principal component analyses conducted to the data of ionic strength-function robustness using the model of PC1 vs. PC2.

were the analytical sensitivities in first ( $S_1$ ) and second ( $S_2$ ) linear ranges of analytical curves (see **Figure 1** in main text) and  $\Delta\Phi$ . Autoscaling of data was performed since the variables are measured in different units. Most of variance was represented by two principal components, namely: PC1 (88.85%) and PC2 (8.06%). In checking the graphic of loadings, all of the variables similarly contributed for PC1. For PC2, in turn, the contribution from  $\Delta\Phi$  was low. More specifically, the respective variables of  $S_1/S_2/\Delta\Phi$  had the following percentage contributions for PC1 and PC2: 33/33/34 and 45/50/5, respectively. As shown in graphic of scores, there was not a pattern relating the average conductivity of the W phases used to investigate the MEC robustness with data set of PCA.

## Routine of analysis by MEC

The experimental procedure of MEC when the solvent is polar is depicted in **Scheme S1**.

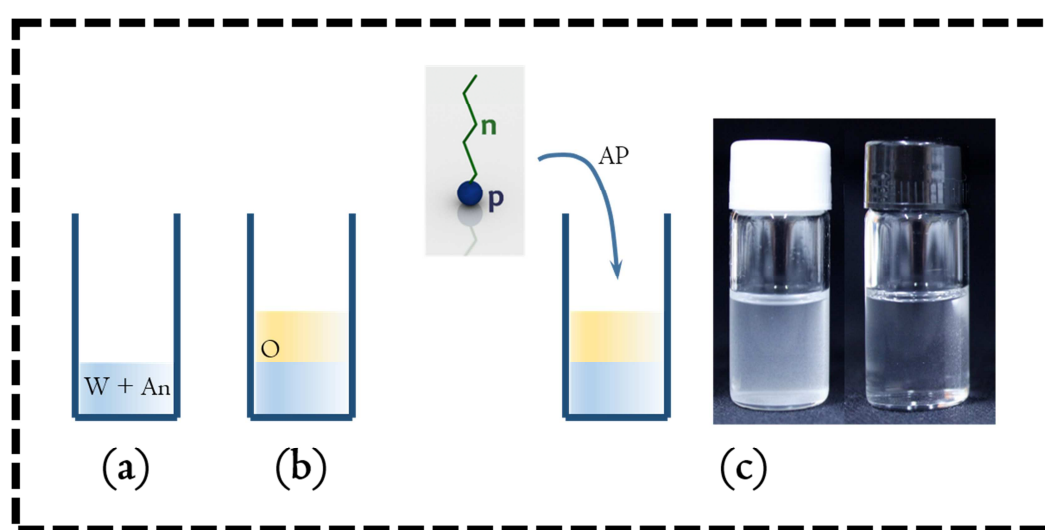

**Scheme S1.** Experimental routine of MEC when the solvent is polar. Preparation of the solution of analyte ( $W + A_n$ ) in polar solvent (a), addition of oil (O) under a specific volume ratio (b), and addition of amphiphile (AP) generating initially heterogeneous dispersions (photo on the left) and, then, microemulsions (photo on the right) by vigorously shaken the  $W$ -O mixtures (c). The minimum volume fractions of AP necessary to produce microemulsion ( $\Phi_{ME}$ ) were used to plot the analytical curves since such a parameter depends on concentrations of analyte. For application to real samples, the procedure is similar. Herein, meanwhile, the sample is applied directly as  $W$  phase, " $W + A_n$ " medium in (a). The symbols 'n' and 'p' represent the non-polar and polar groups of the amphiphile molecule, respectively. Dispersions were attained in bottles of glass or Eppendorf® tubes with the aid of micropipettes.
